# Supplementary material for: Personal and Work-Related Burnout Is Associated with Elevated Diastolic Blood Pressure and Diastolic Hypertension among Working Adults in Chile
Source: MDPI journal article supplement (doi:10.3390/ijerph20031899), 2023-01-19
Supplement: s1 [file s1]

## Supplemental content

Table S1. Association between burnout status and mean systolic blood pressure, diastolic blood pressure, and Hypertension among working adults in Santiago, Chile, with stratification by sex (N = 1,872).

|                                   | N    | %     | Mean SBP            |      | Mean DBP            |      | Hypertension |      |                   |      |
|-----------------------------------|------|-------|---------------------|------|---------------------|------|--------------|------|-------------------|------|
|                                   |      |       | β (95% CI)          | P    | β (95% CI)          | P    | n            | %    | OR (95% CI)       | P    |
| Fully adjusted model <sup>a</sup> |      |       |                     |      |                     |      |              |      |                   |      |
| Men                               | 1379 | 100.0 |                     |      |                     |      | 388          | 28.5 |                   |      |
| No burnout                        | 955  | 69.3  | Ref.                | -    | Ref.                | -    | 244          | 25.5 | Ref.              | -    |
| Only personal burnout             | 153  | 11.1  | -0.51 (-2.83, 1.81) | 0.66 | -0.14 (-1.88, 1.60) | 0.87 | 52           | 34.0 | 1.25 (0.83, 1.84) | 0.28 |
| Only work-related burnout         | 166  | 12.0  | 0.43 (-1.84, 2.70)  | 0.71 | 0.43 (-1.27, 2.13)  | 0.62 | 68           | 41.0 | 1.57 (1.07, 2.28) | 0.02 |
| Both                              | 105  | 7.6   | 0.95 (-1.78, 3.69)  | 0.49 | 2.11 (0.06, 4.15)   | 0.04 | 41           | 39.0 | 1.65 (1.04, 2.58) | 0.03 |
| Women                             | 493  | 100.0 |                     |      |                     |      | 105          | 20.6 |                   |      |
| No burnout                        | 263  | 53.3  | Ref.                | -    | Ref.                | -    | 57           | 21.7 | Ref.              | -    |
| Only personal burnout             | 115  | 23.3  | -1.28 (-4.64, 2.09) | 0.46 | 1.15 (-1.11, 3.41)  | 0.32 | 27           | 23.5 | 1.07 (0.59, 1.91) | 0.82 |
| Only work-related burnout         | 49   | 9.9   | -0.64 (-5.27, 4.00) | 0.79 | -2.60 (-5.71, 0.52) | 0.10 | 9            | 18.4 | 0.82 (0.33, 1.90) | 0.66 |
| Both                              | 66   | 13.4  | -2.72 (-6.96, 1.51) | 0.21 | 0.62 (-2.23, 3.46)  | 0.67 | 12           | 18.2 | 0.68 (0.31, 1.44) | 0.33 |

Abbreviations:  $\beta$ , coefficient; CI, confidence interval; DBP, diastolic blood pressure; OR, odds ratio; Ref., referent group; SBP, systolic blood pressure.

<sup>a</sup> Adjusted for sociodemographic (continuous age, country, and highest education levels), behavioral (BMI, smoking status, alcohol consumption, and physical activity), and occupational characteristics (work sector, work type, and work shift).
